# Supplementary material
Source: publisher site journal article supplement (https://www.spandidos-publications.com/6136/downloadSupplementary)
Supplement: Supplementary file 1 [file downloadSupplementary]

## Sheet: 工作表 1 - table S2
Table SII. Gene set enrichment analysis of DEGs between high and low ecCAF groups in TCGA-CESC.
Variable	ID	Description	setSize	enrichmentScore	NES	pvalue	p.adjust	qvalues	rank	leading_edge	core_enrichment
KEGG_FOCAL_ADHESION	KEGG_FOCAL_ADHESION	KEGG_FOCAL_ADHESION	90	0.471278	2.37021	3.29053e-07	3.98154e-05	3.11734e-05	3611	tags=81%, list=42%, signal=48%	VTN/COL4A6/LAMA1/ITGA5/FN1/LAMA3/FLNC/COL2A1/THBS1/ITGB3/CAV1/RASGRF1/IBSP/ITGA3/LAMC2/VEGFC/COL4A2/COL4A4/TNC/BIRC2/COL5A1/LAMC1/BIRC3/ITGB1/MYLK3/LAMB1/COL4A1/MYL10/EGFR/SHC4/PDGFC/ITGA1/ACTN1/RELN/PDGFB/PDGFD/CAV3/PRKCA/PDGFA/PXN/ITGA9/FLT1/SHC1/VEGFA/IGF1R/CCND2/COL6A1/FLNA/VAV2/COL11A2/LAMA4/BCAR1/MET/ITGB6/TNXB/ITGA7/FLNB/MYL9/MYLK/ROCK2/LAMA5/COL5A2/HGF/COL6A2/CTNNB1/ITGB4/LAMB3/ITGA6/LAMB…
KEGG_DRUG_METABOLISM_CYTOCHROME_P450	KEGG_DRUG_METABOLISM_CYTOCHROME_P450	KEGG_DRUG_METABOLISM_CYTOCHROME_P450	29	-0.570988	-2.5384	5.79903e-06	0.000318074	0.000249036	1375	tags=62%, list=16%, signal=52%	ADH1A/FMO4/ADH1B/FMO3/UGT2B17/ALDH3A1/FMO1/CYP2C18/CYP2A7/CYP2A6/ADH7/UGT2B28/CYP2C19/CYP2C9/CYP2E1/ADH1C/UGT1A7/GSTA1
KEGG_PATHWAYS_IN_CANCER	KEGG_PATHWAYS_IN_CANCER	KEGG_PATHWAYS_IN_CANCER	114	0.411058	2.13857	7.88614e-06	0.000318074	0.000249036	2760	tags=55%, list=32%, signal=38%	FGF4/FGF5/CTNNA2/CCNA1/IL6/PTGS2/COL4A6/KLK3/CXCL8/TGFB2/LAMA1/FGF20/FGF9/FGF18/BMP4/FN1/SHH/LAMA3/HHIP/FZD4/MMP1/ITGA3/LAMC2/VEGFC/COL4A2/COL4A4/BIRC2/FZD8/LAMC1/BIRC3/ITGB1/LAMB1/WNT7A/COL4A1/DAPK1/EGFR/FZD3/ARNT2/FZD2/PDGFB/BMP2/CDK6/TGFBR2/PRKCA/WNT8B/FZD10/TGFBR1/NKX3-1/PDGFA/VEGFA/PTCH1/EGLN1/IGF1R/FGF2/EGLN3/AXIN2/HIF1A/EPAS1/LAMA4/FGFR1/RARA/NTRK1/MET
KEGG_ECM_RECEPTOR_INTERACTION	KEGG_ECM_RECEPTOR_INTERACTION	KEGG_ECM_RECEPTOR_INTERACTION	43	0.537643	2.294	1.21168e-05	0.000366532	0.000286976	3505	tags=91%, list=41%, signal=54%	VTN/COL4A6/LAMA1/ITGA5/FN1/LAMA3/COL2A1/THBS1/ITGB3/IBSP/ITGA3/LAMC2/COL4A2/COL4A4/TNC/COL5A1/LAMC1/ITGB1/LAMB1/COL4A1/ITGA1/RELN/AGRN/ITGA9/COL6A1/COL11A2/LAMA4/ITGB6/HSPG2/TNXB/ITGA7/LAMA5/COL5A2/COL6A2/ITGB4/LAMB3/ITGA6/DAG1/LAMB2
KEGG_PRIMARY_IMMUNODEFICIENCY	KEGG_PRIMARY_IMMUNODEFICIENCY	KEGG_PRIMARY_IMMUNODEFICIENCY	23	-0.585489	-2.40471	4.04768e-05	0.000979539	0.000766929	3118	tags=87%, list=36%, signal=56%	IL7R/JAK3/BLNK/CD4/IL2RG/AICDA/LCK/PTPRC/BTK/TNFRSF13C/CD79A/ICOS/CD8A/CD3E/IGLL1/ZAP70/CD3D/CD19/CD40LG/TNFRSF13B
KEGG_METABOLISM_OF_XENOBIOTICS_BY_CYTOCHROME_P450	KEGG_METABOLISM_OF_XENOBIOTICS_BY_CYTOCHROME_P450	KEGG_METABOLISM_OF_XENOBIOTICS_BY_CYTOCHROME_P450	25	-0.540393	-2.29367	0.000105165	0.00212083	0.0016605	1375	tags=56%, list=16%, signal=47%	ADH1A/ADH1B/UGT2B17/ALDH3A1/CYP2C18/ADH7/CYP2S1/UGT2B28/CYP2C19/CYP2C9/CYP2E1/ADH1C/UGT1A7/GSTA1
KEGG_OXIDATIVE_PHOSPHORYLATION	KEGG_OXIDATIVE_PHOSPHORYLATION	KEGG_OXIDATIVE_PHOSPHORYLATION	51	-0.402542	-2.08006	0.000155594	0.00268956	0.00210578	4478	tags=94%, list=52%, signal=45%	NDUFS3/NDUFA7/NDUFC1/NDUFB5/COX17/MT-ND3/NDUFB8/COX4I1/ATP5PF/ATP5F1E/MT-ND2/ATP5MF/ATP5MC1/NDUFA2/UQCRQ/COX5A/ATP5MG/COX8A/ATP5ME/MT-CO1/ATP6V1F/MT-CO3/NDUFA6/NDUFS8/MT-CO2/NDUFB4/NDUFA3/NDUFS6/NDUFB1/COX6C/NDUFA1/NDUFB2/UQCR10/NDUFB7/NDUFS7/ATP5PO/COX7B/COX5B/NDUFA9/NDUFA11/COX6B1/NDUFB9/COX6A1/UQCR11/ATP5F1D/COX7A1/ATP6V1C2/ATP12A
KEGG_RETINOL_METABOLISM	KEGG_RETINOL_METABOLISM	KEGG_RETINOL_METABOLISM	23	-0.547573	-2.24898	0.000328635	0.00497061	0.00389173	1375	tags=78%, list=16%, signal=66%	CYP3A5/CYP2C8/DHRS3/BCO1/ADH1A/ADH1B/UGT2B17/CYP2C18/CYP2A7/CYP2A6/ADH7/UGT2B28/CYP2C19/RDH12/CYP2C9/ADH1C/CYP26A1/UGT1A7
KEGG_TGF_BETA_SIGNALING_PATHWAY	KEGG_TGF_BETA_SIGNALING_PATHWAY	KEGG_TGF_BETA_SIGNALING_PATHWAY	29	0.500648	1.96124	0.00234386	0.0315119	0.0246722	2247	tags=59%, list=26%, signal=43%	BMP5/LEFTY1/TGFB2/BMP4/NOG/THBS1/SMAD9/INHBE/INHBA/BMPR1B/FST/INHBB/BMP2/TGFBR2/TGFBR1/BMP6/TNF
KEGG_AXON_GUIDANCE	KEGG_AXON_GUIDANCE	KEGG_AXON_GUIDANCE	38	0.451753	1.86503	0.00368639	0.0446053	0.0349237	1405	tags=34%, list=16%, signal=29%	L1CAM/SEMA3A/UNC5A/SEMA3B/DPYSL5/UNC5D/EFNB3/EPHA7/LRRC4C/SLIT2/SEMA5B/ITGB1/SLIT1
KEGG_T_CELL_RECEPTOR_SIGNALING_PATHWAY	KEGG_T_CELL_RECEPTOR_SIGNALING_PATHWAY	KEGG_T_CELL_RECEPTOR_SIGNALING_PATHWAY	32	-0.403961	-1.85814	0.00476893	0.0471621	0.0369255	2764	tags=59%, list=32%, signal=40%	PIK3CG/CD247/CD4/PIK3R5/LCK/PTPRC/ITK/GRAP2/CD3G/RASGRP1/CTLA4/ICOS/CD8A/CD3E/ZAP70/CD3D/CD28/CD40LG/IL2
KEGG_SMALL_CELL_LUNG_CANCER	KEGG_SMALL_CELL_LUNG_CANCER	KEGG_SMALL_CELL_LUNG_CANCER	33	0.465631	1.87759	0.00490085	0.0471621	0.0369255	1499	tags=45%, list=17%, signal=38%	PTGS2/COL4A6/LAMA1/FN1/LAMA3/ITGA3/LAMC2/COL4A2/COL4A4/BIRC2/LAMC1/BIRC3/ITGB1/LAMB1/COL4A1
KEGG_MELANOMA	KEGG_MELANOMA	KEGG_MELANOMA	22	0.522601	1.92107	0.005067	0.0471621	0.0369255	2760	tags=68%, list=32%, signal=46%	FGF4/FGF5/FGF20/FGF9/FGF18/EGFR/PDGFC/PDGFB/PDGFD/CDK6/PDGFA/IGF1R/FGF2/FGFR1/MET
